# Supplementary material for: Selection on cis-Regulatory Variation at B4galnt2 and Its Influence on von Willebrand Factor in House Mice
Source: PubMed Central journal article supplement — Mol Biol Evol. 2008 Dec 16;26(3):567–78. doi: 10.1093/molbev/msn284 (PMC2727395; doi:10.1093/molbev/msn284), 2008-12-16
Supplement: msn284_2.pdf [file msn284_2.pdf]

Figure S2.

| Seq. Frag.        | 1   | 2     | 3   | 4       | 5                         | 6                       | 7                         | 8                 | 9                       |   |   |       |       |       |       |       |       |       |       |
|-------------------|-----|-------|-----|---------|---------------------------|-------------------------|---------------------------|-------------------|-------------------------|---|---|-------|-------|-------|-------|-------|-------|-------|-------|
| <i>M. famulus</i> | C A | C T C | G A | C G G C | G G C C G T               | G T T T A A C G C C C A | T T C T C G G G C T G G G | T C C C A G A A A | G G G G T A T T G G C C |   |   |       |       |       |       |       |       |       |       |
| C57BL/6J          | C A | C T C | G A | C G G C | G G C C G T               | G T T T A A C G C C C A | T T C T C G G G C T G G G | T C C C A G A A A | G G G G T A T T G G C C |   |   |       |       |       |       |       |       |       |       |
| RIIIS/J           | C A | C T C | G A | C G G C | G G C C G T               | G T T T A A C G C C C A | T T C T C G G G C T G G G | T C C C A G A A A | G G G G T A T T G G C C |   |   |       |       |       |       |       |       |       |       |
| D03_a             | .   | .     | .   | T A A   | A A T T T C A G C C C G T | T T G                   | G                         | C A               | T C A                   | A | A | G G G | G A A | G G G | G A G | G G G | G A G | G G G | G A G |
| D03_b             | .   | .     | .   | T A A   | A A T T T C A G C C C G T | T T G                   | G                         | C A               | T C A                   | A | A | G G G | G A A | G G G | G A G | G G G | G A G | G G G | G A G |
| D06_a             | .   | [A]   | .   | T A A   | A A T T T C A G C C C G T | T T G                   | G                         | C A               | T C A                   | A | A | G G G | G A A | G G G | G A G | G G G | G A G | G G G | G A G |
| D06_b             | .   | [A]   | .   | T A A   | A A T T T C A G C C C G T | T T G                   | G                         | C A               | T C A                   | A | A | G G G | G A A | G G G | G A G | G G G | G A G | G G G | G A G |
| D25_a             | .   | (A)   | .   | T A A   | A A T T T C A G C C C G T | T T G                   | G                         | C A               | T C A                   | A | A | G G G | G A A | G G G | G A G | G G G | G A G | G G G | G A G |
| D25_b             | .   | (A)   | .   | T A A   | A A T T T C A G C C C G T | T T G                   | G                         | C A               | T C A                   | A | A | G G G | G A A | G G G | G A G | G G G | G A G | G G G | G A G |
| D30_a             | .   | A     | .   | T A A   | A A T T T C A G C C C G T | T T G                   | G                         | C A               | T C A                   | A | A | G G G | G A A | G G G | G A G | G G G | G A G | G G G | G A G |
| D30_b             | .   | A     | .   | T A A   | A A T T T C A G C C C G T | T T G                   | G                         | C A               | T C A                   | A | A | G G G | G A A | G G G | G A G | G G G | G A G | G G G | G A G |
| D40_a             | .   | A     | .   | T A A   | A A T T T C A G C C C G T | T T G                   | G                         | C A               | T C A                   | A | A | G G G | G A A | G G G | G A G | G G G | G A G | G G G | G A G |
| D40_b             | .   | A     | .   | T A A   | A A T T T C A G C C C G T | T T G                   | G                         | C A               | T C A                   | A | A | G G G | G A A | G G G | G A G | G G G | G A G | G G G | G A G |
| D42_a             | (.) | (G)   | (G) | T A A   | A A T T T C A G C C C G T | T T G                   | G                         | C A               | T C A                   | A | A | G G G | G A A | G G G | G A G | G G G | G A G | G G G | G A G |
| D42_b             | (A) | (G)   | (G) | T A A   | A A T T T C A G C C C G T | T T G                   | G                         | C A               | T C A                   | A | A | G G G | G A A | G G G | G A G | G G G | G A G | G G G | G A G |
| D44_a             | (.) | (G)   | (G) | T A A   | A A T T T C A G C C C G T | T T G                   | G                         | C A               | T C A                   | A | A | G G G | G A A | G G G | G A G | G G G | G A G | G G G | G A G |
| D44_b             | (A) | (G)   | (G) | T A A   | A A T T T C A G C C C G T | T T G                   | G                         | C A               | T C A                   | A | A | G G G | G A A | G G G | G A G | G G G | G A G | G G G | G A G |
| D57_a             | (.) | (G)   | (G) | T A A   | A A T T T C A G C C C G T | T T G                   | G                         | C A               | T C A                   | A | A | G G G | G A A | G G G | G A G | G G G | G A G | G G G | G A G |
| D57_b             | (A) | (G)   | (G) | T A A   | A A T T T C A G C C C G T | T T G                   | G                         | C A               | T C A                   | A | A | G G G | G A A | G G G | G A G | G G G | G A G | G G G | G A G |
| MC06_a            | (.) | (G)   | (G) | T A A   | A A T T T C A G C C C G T | T T G                   | G                         | C A               | T C A                   | A | A | G G G | G A A | G G G | G A G | G G G | G A G | G G G | G A G |
| MC06_b            | (A) | (G)   | (G) | T A A   | A A T T T C A G C C C G T | T T G                   | G                         | C A               | T C A                   | A | A | G G G | G A A | G G G | G A G | G G G | G A G | G G G | G A G |
| MC17_a            | (.) | (G)   | (G) | T A A   | A A T T T C A G C C C G T | T T G                   | G                         | C A               | T C A                   | A | A | G G G | G A A | G G G | G A G | G G G | G A G | G G G | G A G |
| MC17_b            | (A) | (G)   | (G) | T A A   | A A T T T C A G C C C G T | T T G                   | G                         | C A               | T C A                   | A | A | G G G | G A A | G G G | G A G | G G G | G A G | G G G | G A G |
| MC41_a            | (G) | (G)   | (G) | T A A   | A A T T T C A G C C C G T | T T G                   | G                         | C A               | T C A                   | A | A | G G G | G A A | G G G | G A G | G G G | G A G | G G G | G A G |
| MC41_b            | [G] | [G]   | [G] | T A A   | A A T T T C A G C C C G T | T T G                   | G                         | C A               | T C A                   | A | A | G G G | G A A | G G G | G A G | G G G | G A G | G G G | G A G |
| MC45_a            | (.) | (G)   | (G) | T A A   | A A T T T C A G C C C G T | T T G                   | G                         | C A               | T C A                   | A | A | G G G | G A A | G G G | G A G | G G G | G A G | G G G | G A G |
| MC45_b            | (A) | (G)   | (G) | T A A   | A A T T T C A G C C C G T | T T G                   | G                         | C A               | T C A                   | A | A | G G G | G A A | G G G | G A G | G G G | G A G | G G G | G A G |
| MC50_a            | (.) | (G)   | (G) | T A A   | A A T T T C A G C C C G T | T T G                   | G                         | C A               | T C A                   | A | A | G G G | G A A | G G G | G A G | G G G | G A G | G G G | G A G |
| MC50_b            | (A) | (G)   | (G) | T A A   | A A T T T C A G C C C G T | T T G                   | G                         | C A               | T C A                   | A | A | G G G | G A A | G G G | G A G | G G G | G A G | G G G | G A G |
| MC55_a            | (.) | (G)   | (G) | T A A   | A A T T T C A G C C C G T | T T G                   | G                         | C A               | T C A                   | A | A | G G G | G A A | G G G | G A G | G G G | G A G | G G G | G A G |
| MC55_b            | (A) | (G)   | (G) | T A A   | A A T T T C A G C C C G T | T T G                   | G                         | C A               | T C A                   | A | A | G G G | G A A | G G G | G A G | G G G | G A G | G G G | G A G |
| MC74_a            | (.) | (G)   | (G) | T A A   | A A T T T C A G C C C G T | T T G                   | G                         | C A               | T C A                   | A | A | G G G | G A A | G G G | G A G | G G G | G A G | G G G | G A G |
| MC74_b            | (A) | (G)   | (G) | T A A   | A A T T T C A G C C C G T | T T G                   | G                         | C A               | T C A                   | A | A | G G G | G A A | G G G | G A G | G G G | G A G | G G G | G A G |
| MC81_a            | (.) | (G)   | (G) | T A A   | A A T T T C A G C C C G T | T T G                   | G                         | C A               | T C A                   | A | A | G G G | G A A | G G G | G A G | G G G | G A G | G G G | G A G |
| MC81_b            | (A) | (G)   | (G) | T A A   | A A T T T C A G C C C G T | T T G                   | G                         | C A               | T C A                   | A | A | G G G | G A A | G G G | G A G | G G G | G A G | G G G | G A G |
| Rel. Pos.         | -55 | -38   | -29 | -19     | -10                       | -1                      | 4.2                       | 20                | 41                      |   |   |       |       |       |       |       |       |       |       |

- = SNPS distinguishing RIIIS/J from C57BL/6J inbred strain
- = Missing Data
- ( ) = Uncertain (<90%) haplotypic phase
- [ ] = Uncertain (<90%) predicted genotype
- = Genotype prediction not applicable to missing outgroup data

**Figure S2. Summary of polymorphic sites across *B4galnt2* gene region and haplotypic phase.** Phase was determined by PHASE version 2.1 (Stephens *et al.*, 2001; Stephens and Donnelly, 2003). “D” is the identifier for individuals from the German population, “MC” is the identifier for individuals from the French population. For polymorphic sites where outgroup data was obtainable, the derived state of the polymorphic site is displayed as a letter.
